# Supplementary material for: Orbivirus NS4 Proteins Play Multiple Roles to Dampen Cellular Responses
Source: MDPI journal article supplement (doi:10.3390/v15091908), 2023-09-12
Supplement: s1 [file s1]

Supplementary figures and tables for manuscript "Orbivirus NS4 Proteins Play Multiple Roles to Dampen Cellular Responses" Mohd Jaafar et al.

```

1           21           41           61           81
|           |           |           |           |
GTAATGCAAGAGATCAGCATGGCGCAGCATGTGATGATGGCACCAGGCGATCTTATTCTGGAAGTTGAGGACCAGATACGGAGGAGAGGT
- C K R S A W R S M - - W H Q A I L F W K L R T R Y G G E V

          101          121          141          161
          |          |          |          |
ATGGCGGTTCAATGTGTTACAACAGGATGGCGAGGGAACCAAATCTCGCCGTTCTTCCGCCGACCTTACCTCTTCCATTCCATCTCATTCA
W R F M C Y N R M A R E P N L A V L P P T L P L P F H L I H

181          201          221          241          261
|           |           |           |           |
CCGGCCGTTTCCACCCCTGAGGTATCGGAATATCTGAATCGAGCGTTTAACTTAATGTGGGGTCGTATGACGAGGGTCCATTGCCAGAA
R P F P P L R Y R N I - I E R L T L M W G R M T R V H C Q K
          TCA (S)
          TTA (L)
          AGA (R)
          CGA (R)
          GGA (G)
          TGC (C)
          TGT (C)
          TGG (W)

          281          301          321          341
          |          |          |          |
GGCCCTCCCATCTTCCTTTCGCTCAAAGGATCCATCCCTCAATGAGGCCAACCTTCTTCTAGTGCCATTGAAAGATGGCCTCCGTTTCGT
A L P S S F R S K D P S S M R P T F F L V P F E R W P P F V

361          381          401          421          441
|           |           |           |           |
TCTACCTATGAGAAGGCTTGAAAAAGTCCAATCTCAAGGTTTTCGAGTATCCTCAAACCTGTTCCGGACGCAAGACGAGCTCCTCAATGAG
L P M R R L - K S P I S R F S S I L K L F G R K T S S S M R

          461          481          501          521
          |          |          |          |
ATAAAACACTCAGAGAGGGGTGCTTCTTCTACACGACGTAGGCAGAAACGGGTGGATCTAGTGACAAACGATCCGAGTTACGTCCAAGAG
- N T Q R G V L L L H D V G R N G W I - - Q T I R V T S K R

541          561          581          601          621
|           |           |           |           |
GCGGCGGCATACTACTCGGCTCCTACCACTGATCCTACTTGGAAAGCCACATTACGTCGTATTCATGCTCAAGGAACCTATAGTGGGTGGA
R R H T T R L L P L I L L G K P H Y V V F M L K E L - W V E

          641          661          681          701
          |          |          |          |
GCCTATGATCAAGAAATTTCTCCCAAACCTCCCTTCGAAGCCTTCTTGGATTTCCCTTGACTCCAGGGGATGAGCACTCCCTCTCGCACAC
P M I K K F L P N L P S K P S W I S L T P G D E H S L S H T

721          741          761
|           |           |
GCCCCCGCGTGATAGACGGGTAGTCATGCATCTCTTCTCATACT
P P A - - T G S H A S L L I

```

**Figure S1.** Sequence of genome segment 9 of St Croix River virus showing the ORF of NS4 (highlighted in yellow) interrupted by a TGA stop codon (in red at position 215-217). The eight possible codons which restore the ORF are shown, encoding six possible amino acids.

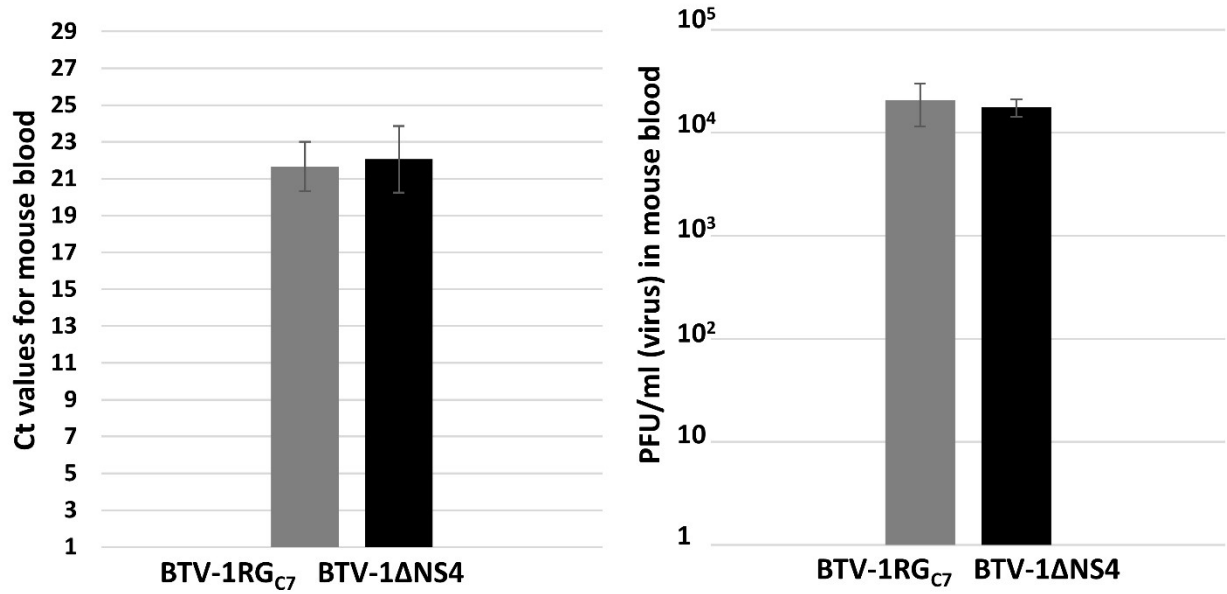

**Figure S2.** Ct values for viral RNAemia determined by RT-PCR and virus titres expressed in pfu/ml determined by plaque assay in mice inoculated with BTV-1RG<sub>C7</sub> or BTV-1ΔNS4.

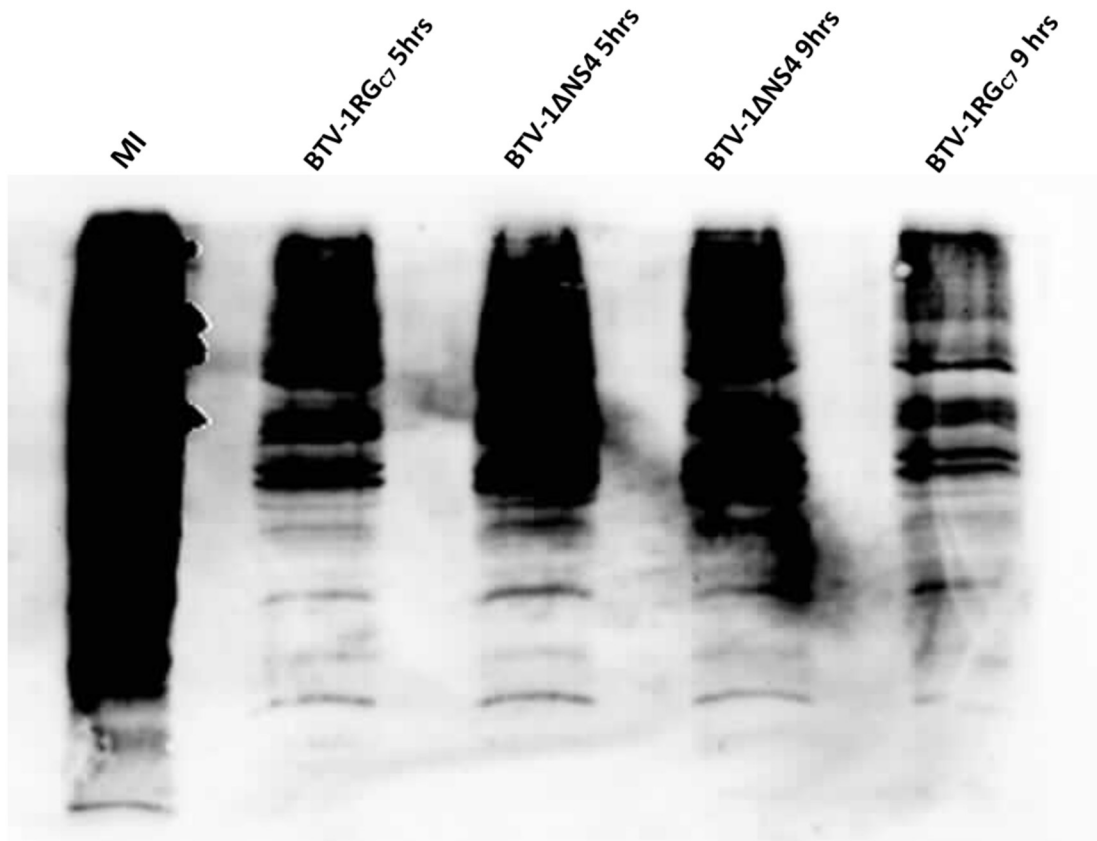

**Figure S3.** Pulse / chase metabolic labelling of BSR cells infected with BTV-1RG<sub>C7</sub> or BTV-1ΔNS4. This figure is identical to figure 3 in the main text, however with a longer exposure of the blot upon chemiluminescent detection. It depicts pulse / chase metabolic labelling of BSR cells infected with BTV-1RG<sub>C7</sub> or BTV-1ΔNS4 at 5 h and 9 h p.i. using L-azidohomoalanine (a methionine analogue) as label. MI: mock-infected.

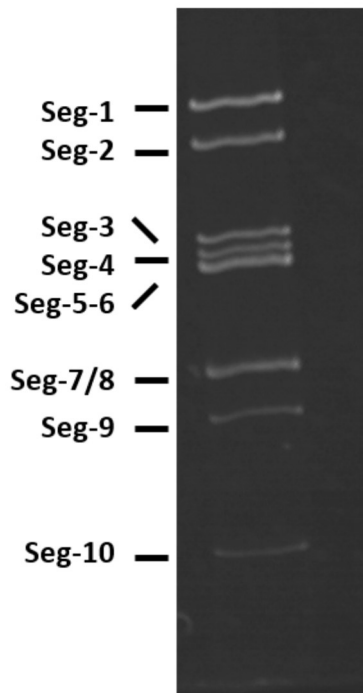

**Figure S4.** Purified dsRNA of Great Island virus, analysed by polyacrylamide gel electrophoresis using a 7.5% acrylamide gel.

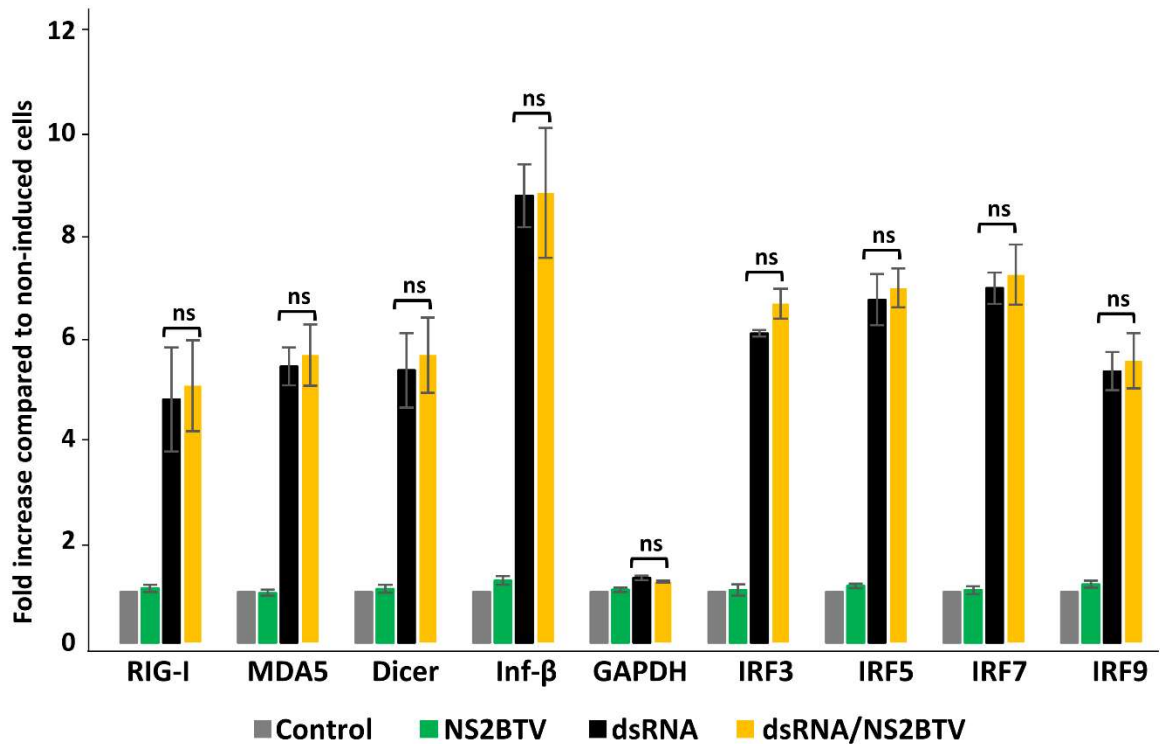

**Figure S5.** Comparison of expression of innate immune genes in HeLa cells induced by purified dsRNA from GIV-infected BSR cells (dsRNA) in the absence or presence of BTV-1 NS2 protein. GAPDH was included as a control gene (not involved in innate immunity). These experiments were conducted as three separate biological replicates. ns= not significant ( $p > 0.5$ ).

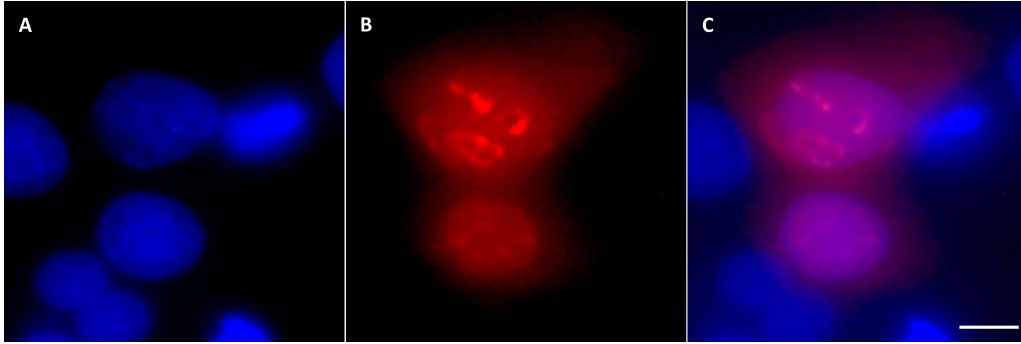

**Figure S6.** BSR cells transfected with plasmid pCIBTV1NS4 (at 24 h post-transfection). **A:** Nuclei stained with DAPI (blue), **B:** NS4 expression in the nucleus and cytoplasm detected by anti-NS4 antibodies and Alexa Fluor 568-conjugated IgG (red) and **C:** merged **A** and **B**. The scale bar represents 5  $\mu$ m.

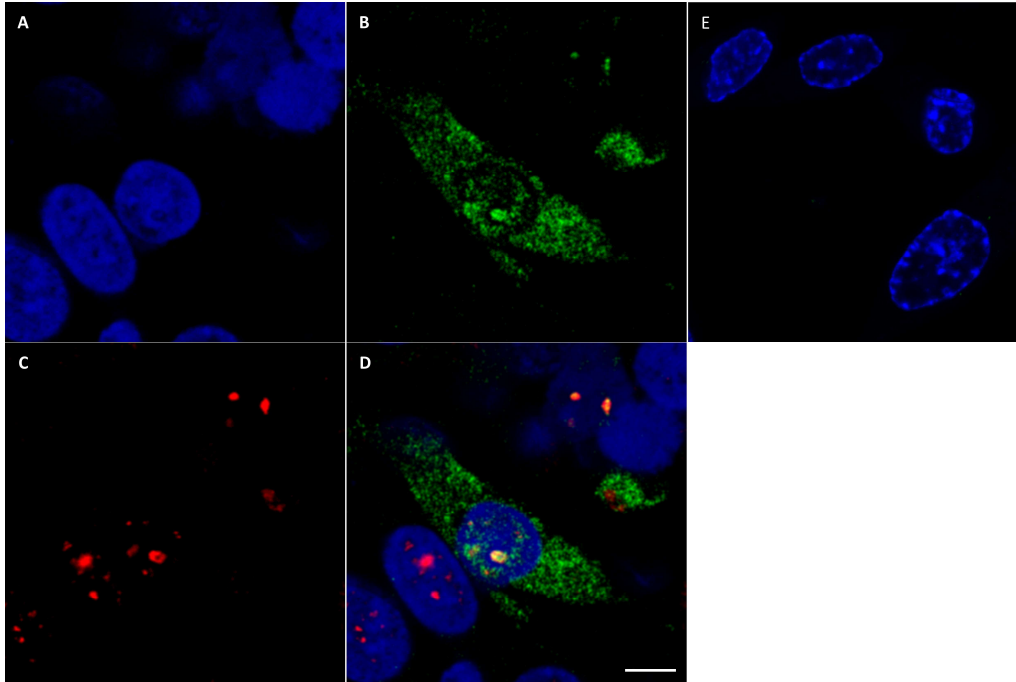

**Figure S7.** BSR cells transfected with plasmid pCIBTV1NS4 and assessed by FAM-FLICA at 24 h post-transfection. **A:** Nuclei stained with DAPI (blue), **B:** FAM-FLICA staining (green) of cells expressing NS4 indicating activation of caspases in transfected cells, **C:** NS4 expression detected by anti-NS4 antibodies and Alexa Fluor 568-conjugated IgG (red), **D:** merged **A**, **B** and **C** showing that NS4 localises with caspases in the nucleus (see Movie 1 for the z-stack, showing a wider field) and **E:** mock-transfected cells. The scale bar represents 5  $\mu\text{m}$ .

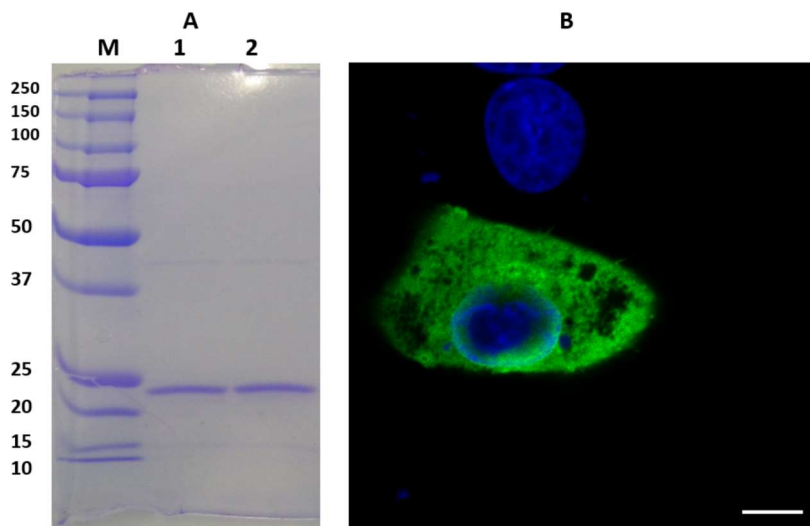

**Figure S8.** Expression of CIRV P19 in BSR cells transfected with plasmid pCIP19-6xHis. **A:** SDS-PAGE and Coomassie blue staining of pCIP19-6xHis protein purified using nickel-coated magnetic beads. **B:** confocal immunofluorescence using mouse anti-pentahis antibodies followed by anti-mouse Alexa Fluor 488-conjugated IgG. Nuclei are stained blue with DAPI.

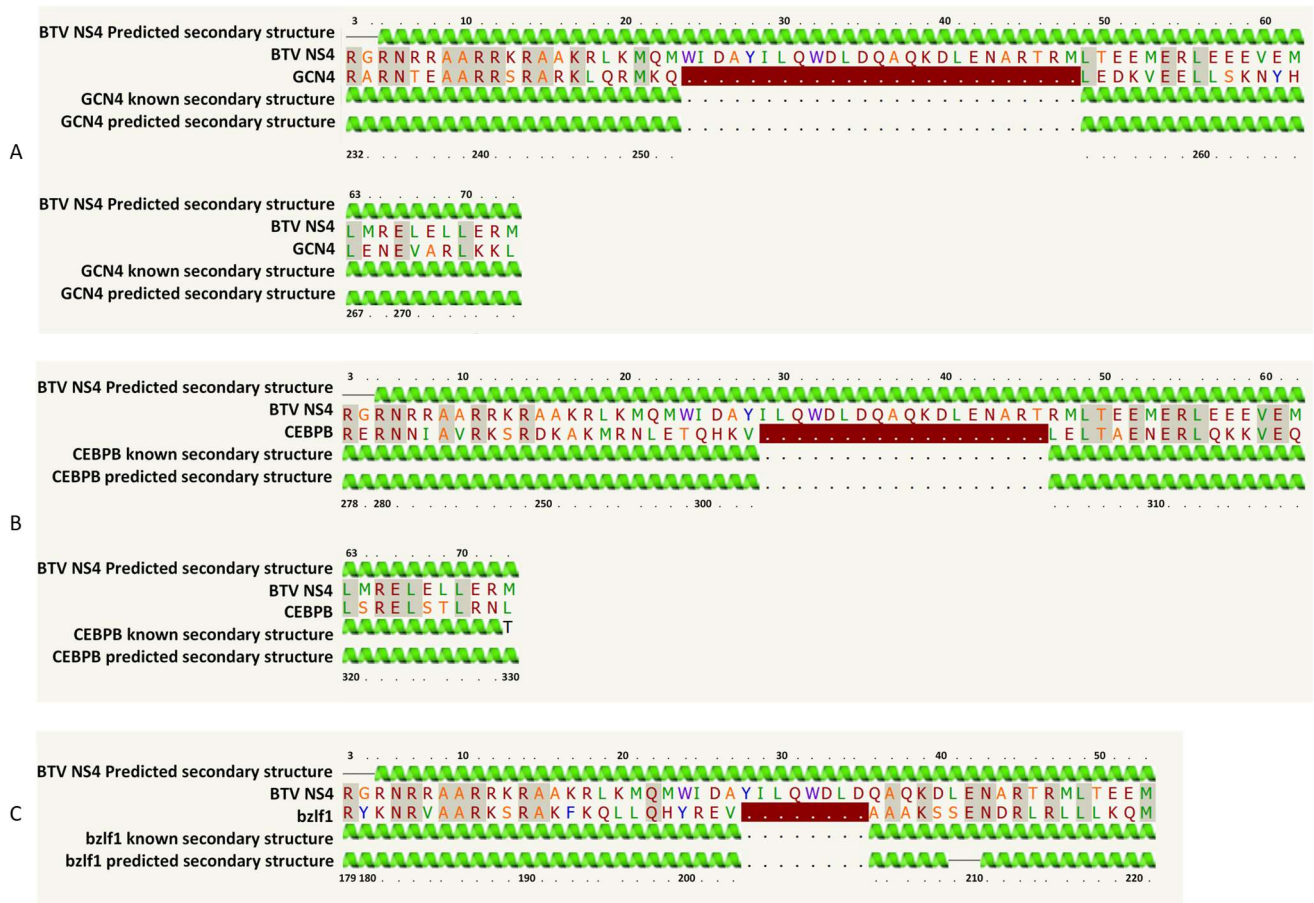

**Figure S9.** Secondary structure predictions for the amino acid sequence of BTX NS4 using Phyre2. The templates identified by Phyre2 are transcriptional regulators which include the general control of amino-acid synthesis like protein 4 or GCN4 (A), the transcription factor c/ebp beta or CEBPB (B) and the Epstein-Barr bzlf1 trans-activator protein (C).

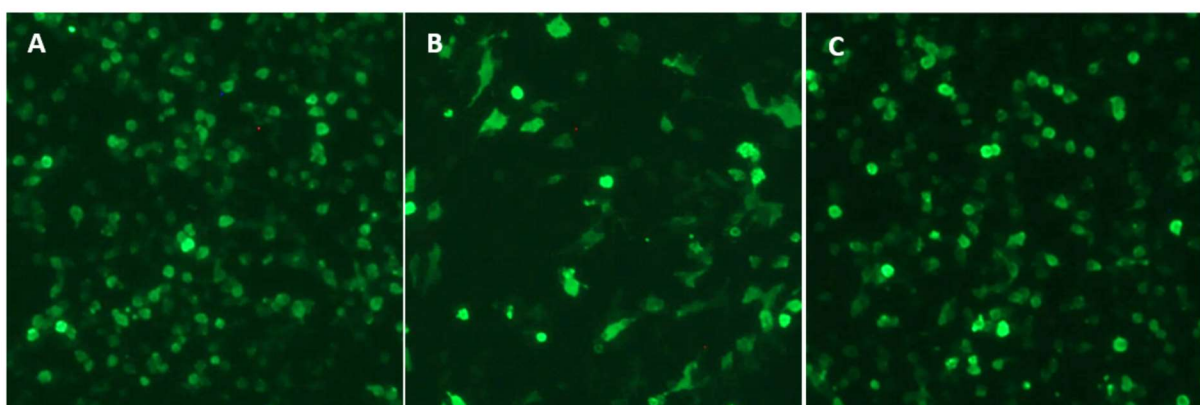

**Figure S10.** HEK293T cells transduced with TAT-tagged proteins. Cells were transduced with TAT-NS4BTV1-6xHis (A), TAT-HA-VP3BTV1-6xHis (B) or TAT-HA-NS4SCRV-6xHis (C) tested with anti-NS4 (A) or anti-HA tag antibodies (B and C). The results show that cells were efficiently transduced with the TAT-tagged proteins.

**Table S1.** Primer sequences used for cloning into mammalian and bacterial expression plasmids.

| Primer                 | Sequence (5'→3')                                                                                    | RE    | Plasmid            | Target                    |
|------------------------|-----------------------------------------------------------------------------------------------------|-------|--------------------|---------------------------|
| NS4BTV1for             | tacgGAATTCACCATGGTGAGGGGACGCAATCG                                                                   | EcoRI | pCI-neo            | Seg-9 BTV-1               |
| NS4BTV1rev             | tgagGCGGCCGCTCACTA <u>CCCATCTTCTCCATTCGCTC</u>                                                      | NotI  | pCI-neo            | Seg-9 BTV-1               |
| NS4BTV1-6xHisrev       | tgagGCGGCCGCTCACTA <b><i>GTGATGGTGATGGTGATG</i></b> <u>CCCATCTTCTCCATTCGCTC</u>                     | NotI  | pCI-neo/pGEXT-4T-2 | Seg-9 BTV-1               |
| NS4GIVfor              | CTATCGGAATTCACCATGAGTTACCGGCAGGAGCA                                                                 | EcoRI | pCI-neo            | Seg-9 GIV                 |
| NS4GIVrev              | tgatGCGGCCGCTCACTA <u>TTGCTGAACGCACCTTGTC</u>                                                       | NotI  | pCI-neo            | Seg-9 GIV                 |
| TAT-NS4BTV1for         | tacgGAATTCCTTACGGCCGCAAGAAACGCCGCCAGCGCCGCCGCATGGTGAGGGGACGCAATCG                                   | EcoRI | pGEXT-4T-2         | Seg-9 BTV-1               |
| TAT-HA-VP3for          | tacgGAATTCCTTACGGCCGCAAGAAACGCCGCCAGCGCCGCCGCTATCCGTATGATGTTCCGGAT<br>TATGCAATGGCTGCTCAGAATGAGCAACG | EcoRI | pGEXT-4T-2         | Seg-3 BTV-1               |
| VP3-6xHisrev           | tgagGCGGCCGCTCACTA <b><i>GTGATGGTGATGGTGATG</i></b> CACAGTTGGCGCAGCCAGCTTGGTGC                      | NotI  | pGEXT-4T-2         | Seg-3 BTV-1               |
| TAT-HA-NS4SCRV (R) for | tacgGAATTCCTTACGGCCGCAAGAAACGCCGCCAGCGCCGCCGCTATCCGTATGATGTTCCGGAT<br>TATGCAATGTGTTACAACAGGATGGCGAG | EcoRI | pGEXT-4T-2         | Seg-9 SCRIV               |
| NS4SCRV (R) -6xHisrev  | tgagGCGGCCGCTCACTA <b><i>GTGATGGTGATGGTGATG</i></b> AAGCCTTCTCATAGGTAGAACGAAC                       | NotI  | pGEXT-4T-2         | Seg-9 SCRIV               |
| NS2BTV1For             | tcagCCCGGGTCATGGAGCAAAAGCAACGTAGA                                                                   | XmaI  | pCI-neo            | Seg-8 BTV-1               |
| NS2BTV1rev             | tgagGCGGCCGCTA <u>AACGCCGACCGGCAATATGA</u>                                                          | NotI  | pCI-neo            | Seg-8 BTV-1               |
| P19-For                | agctgGGATCCACCATGGAACGAGCTATAACAAGGAAAC                                                             | BamHI | pCI-neo            | P19 TBSV                  |
| P19-6xHisrev           | tgagGCGGCCGCTCATT <b><i>GTGATGGTGATGGTGATG</i></b> <u>CTCGCTTCTTTCTTGAAGTTTC</u>                    | NotI  | pCI-neo            | P19 TBSV                  |
| Sigma3MRV3for          | tacgGAATTCGCAATGGAGGTGTGCTTGC                                                                       | EcoRI | pCI-neo            | Seg-S4 MRV3               |
| Sigma3MRV3Rev          | tgagGCGGCCGCTCATT <u>GCCAAGAATCATCGGATCGC</u>                                                       | NotI  | pCI-neo            | Seg-S4 MRV3               |
| IFNβ-PromKpnIfor       | tacgGGTACCTTCTCAGGTCGTTTGCTTCC                                                                      | KpnI  | pGL3               | Human interferon promoter |
| IFNβ-PromXhoIrev       | tacgCTCGAGGTTGACAACACGAACAGTGTC                                                                     | XhoI  | pGL3               | Human interferon promoter |

Underlined sequences are specific to the amplified sequence; Sequences in bold italics characters represent the 6xHis tag; Sequences in italics (non-bold) represent the TAT tag; Sequences in blue characters are restriction enzyme (RE) sites.; Sequences in lower case characters are non-specific nucleotides added for an efficient restriction enzyme digestion; Sequences in red in the reverse primers represent stop codons.

The GIV NS4 ORF (accession number HM543473) contains a naturally occurring NotI site 'GCGGCCGC', which we mutated to GCGACCGC to avoid truncation of the ORF during cloning; the mutation does not modify the amino acid sequence).

**Table S2.** Antibodies used in immunofluorescence and western blot analyses.

| Primary antibody                           | Source                  | Dilution | Species in which antibodies were raised |
|--------------------------------------------|-------------------------|----------|-----------------------------------------|
| Anti-NS4-BTV                               | Belhouchet et al., 2011 | 1/500    | Rabbit                                  |
| Anti-NS4-GIV                               | Belhouchet et al., 2011 | 1/500    | Rabbit                                  |
| Anti-Penta His                             | Qiagen, 34660           | 1/500    | Mouse                                   |
| Anti-Caspase 3                             | Santa-Cruz sc-7272      | 1/100    | Mouse                                   |
| Secondary antibody                         | Source                  | Dilution | Species in which antibodies were raised |
| Alexa Fluor 568 (red) goat anti-mouse      | Thermo Fisher A-11031   | 1/250    | Goat                                    |
| Alexa Fluor 488 (green) goat anti-mouse    | Thermo Fisher A-11001   | 1/500    | Goat                                    |
| Alexa Fluor 488 (green) donkey anti-rabbit | Thermo Fisher A-21206   | 1/500    | Donkey                                  |
| Alexa Fluor 568 (red)) goat anti-rabbit    | Thermo Fisher A-11036   | 1/250    | Goat                                    |
| Anti-mouse peroxidase                      | Beckman IM0817          | 1/750    | Goat                                    |
| Anti-rabbit peroxidase                     | Sigma, A0545            | 1/500    | Goat                                    |

**Table S3.** Primer sequences used for real time PCRs.

| Primer         | Sequence (5'→3')                          | RE | Target                    |
|----------------|-------------------------------------------|----|---------------------------|
| CulicoDcr-2For | CATCTCCTTGCAACTGAAGACG                    | NA | <i>Culicoides</i> Dcr-2   |
| CulicoDcr-2Rev | CGTCGAATCAGCTGTTTGGG                      | NA | <i>Culicoides</i> Dcr-2   |
| Act1CulicoFor  | GTTGCACCAGAAGAACATCCAG                    | NA | <i>Culicoides</i> Actin-1 |
| Act1CulicoRev  | CCAGTGGTACGACCTGAAGC                      | NA | <i>Culicoides</i> Actin-1 |
| EMCVBS2        | CGGCACAACCCAGTGCCAC                       | NA | EMCV                      |
| EMCVBR2        | CCAGATCAGATCCCATACAATG                    | NA | EMCV                      |
| CoxIHamFor     | GATTTGGAAACTGACTTGATC                     | NA | Hamster CoxI              |
| CoxIHamrev     | AGACTGTTCAACCAGTTCAGC                     | NA | Hamster CoxI              |
| NS4BTfor       | GATCTGGATCAAGCGCAAAA                      | NA | NS4 BTV-1                 |
| NS4BTrev       | ACCTTTCATCTCCTCTGTCAACA                   | NA | NS4 BTV-1                 |
| NS4BTProb      | [FAM] ACCTGGAGAACGCGCAACGAGA [TAMRA]      | NA | NS4 BTV-1                 |
| NS4GIVfor      | ACGAGTCCTCGGGTCTGAAAT                     | NA | NS4 GIV                   |
| NS4GIVrev      | TGACCAACTCCGAGCTCCTT                      | NA | NS4 GIV                   |
| NS4GIVProb     | [FAM] CCTATTCCGATAGAGATCGCGTCTGTT [TAMRA] | NA | NS4 GIV                   |
| VACV_forward   | CCGTCCAGTCTGAACATCAATC                    | NA | Vaccinia virus            |
| VACV_reverse   | ACAAATAGAAAAGTGTGTAAACGCAA                | NA | Vaccinia virus            |
| VACV_Probe     | [FAM] CCAACCTAAATAGAACTTCAT [TAM]         | NA | Vaccinia virus            |
| SCRVFor1       | CGGGTCGCCACGCTTAT                         | NA | SCRV                      |
| SCRVRev1       | ACAGCGGAACGCTCAGAGAA                      | NA | SCRV                      |
| SCRVProbe1     | [FAM] CCTCCCACCGTTCGCGACTG [TAMRA]        | NA | SCRV                      |

**Table S4.** Ct values and virus titres in blood of mice infected with BTV-1RG<sub>C7</sub> or BTV-1ΔNS4 at day 4 post-infection (p.i.).

| Virus                 | Ct value Day 4 p.i.      | Viraemia (plaque assay)                                                      |
|-----------------------|--------------------------|------------------------------------------------------------------------------|
| BTV-1RG <sub>C7</sub> | 19.6-23.3 (mean = 21.66) | 1.2x10 <sup>4</sup> -3.5x10 <sup>4</sup> pfu/ml (mean=2.1x10 <sup>4</sup> )  |
| BTV-1ΔNS4             | 19.1-23.8 (mean=22.06)   | 1.4x10 <sup>4</sup> -2.3x10 <sup>4</sup> pfu/ml (mean=1.76x10 <sup>4</sup> ) |
